# Supplementary material
Source: publisher figshare collection journal article supplement (https://sage.figshare.com/ndownloader/files/23255297)
Supplement: Supplementary file 1 [file 23255297]

Table S1 Characteristics of the included studies

| Study | Inclusion criteria | PRP manufacturing technique | Injection | Injection schedule | Control drug | Blind | RoB 2.0 |
| --- | --- | --- | --- | --- | --- | --- | --- |
| Ahmed, 2018 | Primary KOA radiographic mild to moderate OA (K-L1-3), >40y, no coagulopathies, no DMT2, no NSAIDs or anticoagulants, no thrombocytopenia, no previous knee surgery or disorder | 8 mL of blood centrifuged for 9 min at 3500 rpm, No second centrifugation. 4 mL of PRP. Not leucocytes-free | 3 | 1/2 weeks | HA | Single | Some Conc |
| Buendia-Lopez, 2019 | symptomatic knee OA and K-L 1 or 2, no varus > 4,2° or valgus, no analgesic, NSAIDs, anticoagulant or antiplatelet, no previous knee surgery or injection, no active infection, no GI or cardiovascular disease, no inflammatory arthritis | 60 ml of blood. Double centrifugation process (1050 rpm for 15 min + 2000 rpm for 10 min). 5 ml of an LP-PRP, activated by 1 ml of CaCl | 1 | NA | HA | No | Some Conc |
| Cerza, 2012 | K-L 1-3, previous physical or pharmacological therapy, platelet count > 150,000/mcL no previous knee surgery or injection, no inflammatory arthritis or autoimmunity | According to the Authority Operational Office of Haematology of the hospital. 5,5 mL for each infiltration | 4 | 1/week | HA | No | Some Conc |
| Cole, 2016 | Age 18-80, VAS>40 K-L 1-4, unilateral symptoms, no knee instability, or major axial deviation, no DMT2, inflammatory arthritis, anaemia, coagulopathies, infections, or immunodeficiency, no NSAIDs, anticoagulants or HA or steroids injections. No pregnancy. | Low-leukocyte ACP system, Single-spin system. 10 mL of blood spun at 1500 rpm for 5 min. 4 mL of PRP within 30 minutes | 3 | 1/week | HA | Double | Low |
| Di Martino, 2019 | Unilateral symptoms (at least 4 m) or swelling; K-L grade = 0, on MRI or K-L 1-3 on x-ray; age 18-80; no major axial deviation (varus 5, valgus 5); no focal lesion; no concomitant knee lesions; no haematological or cardiovascular diseases, infections, or immunodepression, Hb>11 g/dL platelet>150,000/mm3 | 150-mL of blood was. Two centrifugations (1480 rpm for 6 min + 3400 rpm for 15 min). 20 mL of PRP divided into 4 units of 5 mL. PRP activated by adding 10% calcium chloride. | 3 | 1/week | HA | Double | Some Conc |
| Duymus, 2017 | K-L 2-3, age 47–80 y, BMI <30, stable knees no malalignment, normal blood and coagulation, no knee trauma, no rheumatic pathology, no hip OA, no systemic disease, immunosuppressive or anticoagulant treatment, no previous steroid injection | 16 ml of blood (3700 rpm for 7 min). 3–4 ml of PRP. No additional activator. | 2 | 1/month | HA or O3 | No | Some Conc |
| Elik, 2019 | 50-75 y, VAS>4 in the previous year, KL1-3, Normal hematologic and coagulation parameters, no rheumatic disease, no systemic disease, no IA injection in the previous 3 m, no NSAIDs in the last 7 d, no previous injury or surgery, HBV, HCV, HIV platelet>150,000/mm3, mental retardation | Biphasic centrifugation, 10cc of blood in Na-citratum, 10 minutes at 2000 rpm, activation with 10% cacl2, 5 minutes at 4000rpm, top 4 ml of PRP withdrawn. | 3 | 1/week | Saline | Double | Some Conc |
| Filardo, 2015 | Unilateral symptoms (at least 4 m) or swelling; K-L grade = 0, on MRI or K-L 1-3 on x-ray; age 18-80; no major axial deviation (varus 5, valgus 5); no focal lesion; no concomitant knee lesions; no haematological or cardiovascular diseases, infections, or immunodepression; hb>11 g/dL platelet>150,000/mm3 | 150-mL of blood was. Two centrifugations (1480 rpm for 6 min + 3400 rpm for 15 min). 20 mL of PRP divided into 4 units of 5 mL. PRP activated by adding 10% CaCl. | 3 | 1/week | HA | Double | Low |
| Forogh, 2016 | Pain>60, knee pain>3m, minimal improvement after two OA treatments, K-L2-3, anticoagulant, antithrombotic, or CS interrupted for 10 d, severe systemic disease, active infection, previous knee infection, injection, arthroscopy or surgery, lumbar radiculopathy, drug abuse, no other treatments (6m) | 20 ml of blood. 2 ml of ACD-A was added. Two centrifugations, (1600 rpm for 6 minutes; 2000 rpm for 6 minutes). 5 ml PRP. Activated with 0.5 ml of a Calcium gluconate (1 g/10 ml) | 1 | NA | CS | Double | Some Conc |
| Freie, 2018 | Knee OA, 30-90y, K-L 2-4, no rheumatic disease, no steroids (12m), Hb > 11 g/dl, platelet>150,000/mm3 | 15 ml of blood with 5 ml NaCl a 3,2%. Double centrifugation. 2/3 of PPP were removed. Remaining solution used to suspend the PRP. 5 ml PRP were injected. | 1 | NA | CS | Double | Some Conc |
| Gaballa, 2019 | Early KOA, no systemic or metabolic diseases, no immunosuppressive or anticoagulant treatment, no previous surgery or injection | 15 ml. of blood centrifuged at 1800 rpm for 15 min and then at 3500 rpm for 10 min. | 2 | 1/2 weeks | Ozone | No | Some Conc |
| Ghai, 2019 | 30-65y, bilateral Knee OA, ASA 1-2, pain or swelling >4m, KL 1-2. No DM, immunosuppressive drugs, collagen vascular disorders, cancer or malignant disorders, active knee infection/wound, autoimmune or platelet disorders anticoagulant/antiplatelet (10d) or NSAIDs (2d) or steroid injection (3m) or systemic steroids (2w) genu valgum/varum >20°, HIV/HBV/HCV/Venereal Disease | 50-60mL of blood with Citrate Phosphate Dextrose Adenine (9mL). Transferred from the blood bag into sterile tubes. Centrifuged for 15m (1300rpm). Separated in PRP and Residual Blood Cell (RBCs). The PRP transferred to a sterile tube. 2nd centrifugation (5m, 2200rpm). Platelet pellet suspended in remaining plasma, dispensed in a sterile syringe with 1mL CaCl2. | 1 | NA | Saline | Double | Some Conc |
| Gormeli, 2017 | chronic pain or swelling, K-L 1-4 or K-L0 with cartilage degeneration on MRI. No previous surgery, no systemic disorders, no generalized OA, no anticoagulant treatment, no use of NSAIDs in the previous 5 d, Hb > 11 g/dl, platelet>150,000/mm3 | 150 mL of blood with NaCl. 20 mL of PRP, two centrifugations (1500 rpm for 6 min + 3500 rpm for 12 min). 5 ml/injection | 3 | 1/week | HA or saline | Double | Some Conc |
| Montañez-Heredia, 2016 | K-L 1-3, VAS>5, age 40-80, Platelet>150.000, Negative serology to lue, Hepatitis, HIV, no previous injections, no frontal angular deformity >10°, knee or hip pathology, no ROM deficit, no anticoagulants, no systemic disease, infection, neoplasia or pregnancy | 150 mL of whole blood. double centrifugation | 3 | 1/2 weeks | HA | Double | Some Conc |
| Huang, 2019 | Symptomatic KOA, no pain relief with NSAIDs, K-L1–2, 40-65 y, BMI< 30, stable knees, no malalignment or patellar maltracking, normal blood tests, 0-1+ effusion, no previous surgery, no tricompartimental OA, no RA or hip OA, no systemic metabolic disease, no immunodeficiency, HIV, HBV, HCV, or active infection, no anti-platelet medication in the previous 7d or oral steroids. | 8ml blood centrifuged for 5min at 1500 g RCF or 3500 pm. No second centrifugation. Leucocyte poor-PRP (LP-PRP) was obtained The PRP was activated in vivo. | 3 | 1/week | HA or CS | NR | Some Conc |
| Joshi, 2017 | 40-80 y, KOA, Eligibility for TKA, Walking ability, VAS >60, No steroids, HA or anaesthetics injections, no arthroscopy in the last 3m, No surgery, no rheumatic, liver or blood diseases, no anticoagulants, no active infection or cancer, no severe systemic disease, no immunosuppression or pregnancy, no severe problems to hip or ankle, no limited ROM, no valgus or varus deformity, no allergy to study drugs, no ligament instability, no HIV, HCV, HBV. | Leukocyte-reduced PRP. 60 mL of blood + 3.2% of citrated dextrose. Centrifuged at 280g for 15 minutes. 10% vol/vol of anticoagulant added. Then centrifuged at 680g for 20 min, and re-suspended in 6 mL of autologous plasma. 4 mL of PRP, no exogenous factors for activation. | 1 | NA | CS + anaestetic | Double | Some Conc |
| Kon, 2017 | 40-75 y, KOA, K-L 2-3, BMI<40, mean pain on WOMAC pain >1.75; failed conservative OA therapy; No active infection or effusion, contralateral symptomatic KOA, No rheumatic diseases, isolated patellofemoral OA, no significant varus/valgus, no other site disease affecting the knee, no untreated traumatic injury or meniscal tear, no foreign body, no surgery (6m), no steroid (3m) or HA (6m) injections, no systemic steroids (2w), no active cancer (5y), no pregnancy, no alcohol or drug dependence, no use of study drugs (30d) | 2 steps: the first one with the nSTRIDE Cell Separator to separate the cellular components from plasma and red blood cells in whole blood, a suspension that was loaded in the second step in the nSTRIDE Concentrator, which uses filtration through polyacrylamide beads to concentrate the cytokines in the injectable output. 2.5 mL of APS | 1 | NA | Saline | Double | Low |
| Lana, 2016 | 40-70 y, symptomatic KOA, K-L 1-3, Hb>11mg/dl, platelets>150.000/mm3, No coagulopathies, no axial deviations, no severe system diseases, no immunosuppression, no anticoagulants or NSAIDs, no autoimmunity, no surgery, normal PCR or uric acid | 60 ml of total blood. 8.5 ml of the anticoagulant ACD double centrifugation (300G for 5 min + 700G for 17 min). Activation with autologous thrombin. | 3 | 1/2 weeks | HA | Double | Low |
| Lin, 2019 | 20-80y, VAS>4for >4 m, Ahlbäck I-III, hb>11g/dl, platelets>150.000/mm3 No prior PRP, No prior surgery, no axial deviations, no other knee disorders, no rheumatic diseases, no severe systemic disease, no active infection, no immunodepression, no anticoagulants or NSAIDs or chondroprotectives, no steroids (30d) or HA (6m) injection | 10 mL of blood, double centrifugation (1,500 rpm for 8 min). Leukocyte-poor PRP. Use of anticoagulants was not warranted | 3 | 1/week | HA or saline | Double | Some Conc |
| Lisi, 2018 | Shahriaree grade 2-3, >18 y, no HA or steroids injections; Life expectancy >1 year , no pregnancy, no known allergy to HA; No active infection | 20 mL of whole blood + 2 mL ACD Solution, centrifuged at 900 r/min for 7 min. | 3 | 1/week | HA | Double | Low |
| Louis, 2017 | 20-75 y, symptomatic KOA, K-L≥2, no axial deformity, BMI 20-30, hb>10 g/dL, no pregnancy, no knee instability, platelets>150.000, no infections, no oral steroids or NSAIDs, no steroids (8w) or HA (24w) injections, no autoimmunity, | 52.5 mL (for men) or 37.5 mL (for women) of peripheral blood with 1.5 mL of ACD-A. Double centrifugation (130g for 15 min 250g for 25 min). 4mL of PRP. Activation with CaCl2 | 1 | NA | HA | Double | Some Conc |
| Nabi, 2018 | 30-75 y, ACR 2-3 symptomatic KOA, K-L 2-3, Hb>11 g/dL, platelets>150.000, BMI<35, no axial deformities, no cancer, no rheumatic disease, no pregnancy, no acute infections, no blood disorders, no surgery, no severe systemic diseases no anticoagulants or steroids. | 50-mL of blood + ACD. Double centrifugation (1200 rpm for 15 min + 2700 rpm for 6 min). 5 mL of PRP. | 3 | 1/month | CS | Assessor | Some Conc |
| Papalia, 2016 | End-career athletes, K-L 1-2, symptomatic KOA unresponsive to conservative treatment, no previous surgery, no malalignment, no osteochondral lesions, no hematologic disorders. | 8 ml of blood, centrifuged at 3100rpm for 9 min. | 3 | NR | HA | Assessor | Some Conc |
| Patel, 2013 | Ahlback 1-2, Hb>10mg/dl, no deformity, no generalized or secondary OA, No injection (3m), no arthroscopic lavage (1y), no anticoagulants, no systemic disease, no crystal arthropathy, no active infections or cancer | 100 mL of venous blood with ACD-A1 as an anticoagulant. Centrifuged for 15 min at 1500 rpm Leucocyte filter used to filter off the leucocytes. Total leucocyte count was zero. | 1 | NA | Saline | Double | Some Conc |
| Paterson, 2016 | KOA, K-L 2-3, no analgesic or anti-inflammatory drugs (2w), no systemic or inflammatory joint disease, no crystal arthropathy, no cancer, no immunosuppression, no active infections, no pregnancy, no previous articular treatments (6m), no allergy to study drugs | 48.5 ml blood double-centrifuged (2,000 rpm for 5 min + 3,000 rpm for 3 min). PRP higher in leukocytes, 0.2 ml of sodium bicarbonate 8.4 %. The syringe containing the PRP then underwent low-level ultraviolet light | 3 | 1/week | HA | Double | Low |
| Raeissadat,. 2014 | KOA, 40–70 y, K-L 1–4, Hb>12g/dL, platelets > 150.000/ml, no systemic disease, no active cancer or infection, no recent trauma, no autoimmunity, no anticoagulants (10d) or NSAIDs (2d), no steroids injection (3w) or oral (2w), no pregnancy, no malalignment, no allergy to study drugs | 35–40 mL of blood + 5 mL of ACD-A was added as an anticoagulant. Double-centrifuged (15 min at 1600 rpm 7 min at 2800 rpm) 4–6 mL PRP with leukocytes | 2 | 1/4weeks | HA | No | Some Conc |
| Raeissadat, 2011 | 50-70 y, symptomatic KOA, K-L 2-3, Hb>12g/dL, platelets > 150.000/ml, BMI<33, no systemic disease, no immunodeficiency, no autoimmunity, no cancer, no platelets disease, no NSAIDs (2d) or aspirin (7d), no anticoagulants (10d), no systemic steroids (2w), no injections (3m), no recent trauma, no active infection, no malignement, no allergy to study drugs | 35–40 mL of blood + 5 mL of ACD-A was added as an anticoagulant. Double-centrifuged (15 min at 1600 rpm 7 min at 2800 rpm) 4–6 mL PRP with leukocytes 1.5 mL of platelet-activating factor (epinephrine + CaCl 25 mmol/L). Placed samples in a warm water (T = 40°C) for 20-30 minutes Third centrifuge (4000 rpm for 4 min) 5 ml fluid (5 mL) used. | 2 | 1/3weeks | HA | Assessor | Some Conc |
| Rahimzadeh, 2018 | 40–70 y, 1-2 KOA, no rheumatic disease, no previous surgery, no alcohol or drug addiction, no anticoagulants or NSAIDs | Double centrifugation (20 min at 3,200 rpm + 5 min at 1,500 rpm). 7 mL of PRP. | 2 | 1/month | Dextrose (prolotherapy) | Double | Some Conc |
| Sanchez, 2012 | 40-72 y, KOA, Pain>35 mm 0-100 VAS, Ahlbäck 4, BMI 20-32, no bilateral polyarticular KOA, Severe deformity, no HA injection (6m), no autoimmunity, no systemic diseases, no blood disorders, no arthroscopy (1y), no immunosuppressive therapy or warfarin, no steroids (3m) or NSAIDs (15d) | 36 mL of peripheral blood + 3.8% sodium citrate as anticoagulant. Centrifuged at 580g for 8 min. Leukocyte-Poor PRP. Activated before infiltration, by adding 400 L of CaCl. | 3 | 1/week | HA | Double | Some Conc |
| Smith, 2016 | 30-80 y, primary KOA, K-L 2-3, no efficacy of conservative treatment, WOMAC–pain>8/20 >2 for 2 question on WOMAC–c, no effusion, no malalignment, no HA (6m), risk of bleeding or infection, no cartilage repair, no cognitive impairment, no previous surgery (6m), no hip/contralateral OA, no steroids (3m), no syst disease, no pregnancy, no rheumatic diseases, no knee infections | 15 mL of blood single spin in a centrifuge at 1500 rpm for 5 min. PRP produced 4-7.1 mL. anticoagulant not necessary. | 3 | 1/week | Saline | Double | Low |
| Su, 2018 | unilateral symptomatic KOA, K-L 2–3, 40–73y, BMI 18–32.5, knee stability, no severe trauma history, no autoimmunity or blood disorders, no immunosuppression, no anticoagulants, no injections (1y), no steroids or NSAIDs (3w) | 45-ml blood + 4 ml sodium citrate. Double-centrifuged at 1480 rpm for 6 min + 3400 rpm for 15 min. 7 ml of concentrated leukocyte-containing PRP. To initiate the activation of platelet clotting, CaCl was added | 2 | 1/2 weeks | HA | No | Some Conc |
| Uslu Güvendi, 2018 | primary KOA, K-L 3, Hb>12g/dl, platelet>150.000/mm3, no steroids (3m) or antiplatelet (7d), no skin lesions, no autoimmunity, no surgery, trauma, or injection (6m), no hip/foot OA, no syst diseases | Blood (18 mL) was collected + 2 mL citrate dextrose. Centrifuged for 5 min at 3.600 rpm. | 1 | NA | CS | Assessor | Some Conc |
| Vaquerizo, 2013 | >50y, symptomatic KOA (6m), K-L 2-4, BMI>40, No NSAIDs or steroid (3m), no malalignment, no allergy to study drugs, no infections, no polyarticular disease, no autoimmunity, no rheumatic disease, no immunosuppression, no cancer. | 36 mL of blood + 3.8% sodium citrate as anticoagulant. Centrifuged at 580g for 8 min. Activated before infiltration with 400 mL of CaCl. PRGF-Endoret injected was 8 mL. | 3 | 1/2weeks | HA | Double | Some Conc |
| Wu, 2018 | Ahlback Stage I–II, 50–75y, symptomatic (VAS>4) bilateral KOA with the same grade, no injections (6m), no anti-inflammatory (1w), no previous surgery, no autoimmunity, no cancer, no liver disease | 10 ml of blood centrifuged at 1500 g (3400 rpm) for 15 mins. 4 ml of PRP. Leukocyte-and platelet-rich plasma. | 1 | NA | Saline | Double | Some Conc |

PRP: platelet-rich plasma; RoB: Risk of Bias; HA: hyaluronic acid; KOA: knee osteoarthritis; DMT2: Diabetes mellitus type 2; NSAIDs: non steroids anti-inflammatory drugs; K-L: kellgren-lawrence; BMI: body mass index; TKA: total knee arthroplasty; CS: corticosteroids; ROMA: range of motion; ACD: acid citrate dextrose; PRGF: platelet rich growth factors;

Table S2 Results of the sensitivity analyses and level of evidence of the different outcomes

| *Compared treatment* | *Outcome* | *Follow-up* | *Results of the double blind RCTs* | *Results of the low risk of bias RCTs* | *Level of evidence* |
| --- | --- | --- | --- | --- | --- |
| Placebo | WOMAC overall | 1 month | -6.5 [-14.4, 1.5] | -12.5 [-23.2, -1.8] | Low |
| 3 months | -10.7 [-23.7, 2.3] | -13.8 [-40.8, 13.2] | Low |
| 6 months | -12.5 [-25.7, 0.69] | -17.1 [-49.2, 15.0] | Low |
| 12 months | -19.4 [-36.0, -2.72] | -20.7 [-46.0, 4.7] | Low |
| WOMAC pain | 1 month | -1.7 [-3.9, 0.6] | -3.0 [-5.5, -0.5] | Moderate |
| 3 months | -3.0 [-5.7, -0.3] | -3.2 [-9.0, 2.5] | Low |
| 6 months | -3.1 [-5.5, -0.7] | -3.4 [-8.8, 1.9] | Low |
| WOMAC stiffness | 1 month | -0.6 [-1.8, 0.7] | -1.4 [-2.7, -0.1] | Low |
| 3 months | -0.9 [-1.3, -0.5] | -0.9 [-1.4, -0.4] | Low |
| 6 months | -1.3 [-2.6, -0.1] | -1.6 [-4.4, 1.2] | Low |
| WOMAC function | 1 month | -4.4 [-11.5, 2.6] | -9.3 [-17.9, -0.7] | Low |
| 3 months | -6.8 [-16.9, 3.3] | -9.9 [-30.6, 10.8] | Low |
| 6 months | -8.0 [-18.6, 2.5] | -11.6 [-34.6, 11.4] | Low |
| VAS | 1 month | -1.5 [-2.1, -0.8] | -1.2 [-2.6, 0.1] | Low |
| 6 months | -1.9 [-2.7, -1.1] | -14.4 [-32.2, 3.5] | Low |
| HA | WOMAC overall | 1 month | -0.6 [-7.2, 6.1] | NA | Low |
| 3 months | -2.0 [-15.8, -11.8] | NA | Very Low |
| 6 months | -2.8 [-7.3, 1.8] | NA | Low |
| 12 months | -13.8 [-24.3, -3.3] | NA | Moderate |
| WOMAC pain | 1 month | -0.3 [-1.1, 0.6] | -0.3 [-1.2, 0.5] | Moderate |
| 3 months | -2.0 [-4.0, 0.2] | -2.4 [-5.0, 0.3] | Low |
| 6 months | -1.5 [-3.6, 0.5] | -2.9 [-6.9, 1.1] | Moderate |
| 12 months | -2.2 [-4.8, 0.3] | -2.2 [-4.8, 0.3] | Moderate |
| WOMAC stiffness | 1 month | 0.1 [-0.4, 0.6] | -0.1 [-0.6, 0.5] | Moderate |
| 3 months | -0.4 [-0.9, 0.1] | -0.5 [-1.0, 0.0] | Low |
| 6 months | -0.1 [-0.4, 0.3] | -0.2 [-0.7, 0.4] | Low |
| 12 months | -0.3 [-0.7, 0.3] | -0.2 [-0.7, 0.3] | Low |
| WOMAC function | 1 month | -4.7 [-12.1, 2.8] | -7.5 [-11.3, -3.6] | Very low |
| 3 months | -6.5 [-13.1, 0.1] | -8.9 [-14.3, -3.5] | Very low |
| 6 months | -3.5 [-5.2, -1.8] | -12.6 [-18.1, -7.2] | Low |
| 12 months | -13.4 [-16.4, -10.4] | -13.4 [-16.4, -10.4] | Low |
| VAS | 1 month | -0.3 [-1.1, 0.6] | -0.5 [-1.3, 0.4] | Moderate |
| 3 months | -0.2 [-1.6, 1.3] | -0.1 [-1.8, 1.6] | Moderate |
| 6 months | -1.1 [-2.0, -0.3] | -1.5 [-2.0, -1.0] | Moderate |
| 12 months | -2.1 [-3.5, -0.8] | -2.1 [-3.5, -0.8] | Moderate |
| IKDC | 6 months | 4.5 [-0.4, 9.4] | 4.3 [-3.3, 11.9] | Low |
| 12 months | 7.6 [1.2, 13.9] | 5.9 [-2.8, 14.7] | Very low |
| Steroids | VAS | 6 months | -2.3 [-3.1, -1.4] | NA | Moderate |
| KOOS sympt | 6 months | 7.7 [-15.5, 31.0] | NA | Low |
| KOOS pain | 6 months | 13.7 [-5.9, 33.3] | NA | Very low |
| KOOS ADL | 6 months | 10.7 [2.7, 18.8] | NA | Low |
| KOOS sports | 6 months | 0.4 [-5.0, 5.7] | NA | Low |
| KOOS QoL | 6 months | 12.1 [5.4, 18.8] | NA | Low |

RCTs: randomized controlled trials; WOMAC: Western Ontario and McMaster Universities Arthritis Index; VAS: visual analogue scale; IKDC: International Knee Documentation Committee; KOOS: Knee injury and Osteoarthritis Outcome Score; ADL: activity of daily living; QoL: quality of life; NA: Not Available.

**Figure S1** Forest plots of WOMAC overall in the comparison between PRP and placebo

**Figure S2** Forest plots of WOMAC pain in the comparison between PRP and placebo

**Figure S3** Forest plots of WOMAC stiffness in the comparison between PRP and placebo

**Figure S4** Forest plots of WOMAC function in the comparison between PRP and placebo

**Figure S5** Forest plots of VAS in the comparison between PRP and placebo

**Figure S6** Forest plots of adverse events in the comparison between PRP and placebo

**Figure S7** Forest plots of WOMAC overall in the comparison between PRP and hyaluronic acid

**Figure S8** Forest plots of WOMAC pain in the comparison between PRP and hyaluronic acid

**Figure S9** Forest plots of WOMAC stiffness in the comparison between PRP and hyaluronic acid

**Figure S10** Forest plots of WOMAC function in the comparison between PRP and hyaluronic acid

**Figure S11** Forest plots of VAS in the comparison between PRP and hyaluronic acid

**Figure S12** Forest plots of IKDC in the comparison between PRP and hyaluronic acid

**Figure S13** Forest plots of adverse events in the comparison between PRP and hyaluronic acid

**Figure S14** Forest plots of VAS in the comparison between PRP and corticosteroids

**Figure S15** Forest plots of KOOS in the comparison between PRP and corticosteroids
